# Supplementary material
Source: PubMed Central journal article supplement (PMC1895503)
Supplement: blood_blood-2006-03-009910_8.pdf [file blood_blood-2006-03-009910_8.pdf]

|                           | No. of patients / total No. of each copy (%) |                  | P      |
|---------------------------|----------------------------------------------|------------------|--------|
|                           | > = 20%, < 80%                               | >= 80%, < = 100% |        |
| 3 copies of 1q21 n =117   | 54/117 (46%)                                 | 63/117 (54%)     | 0.239  |
| >= 4 copies of 1q21 n =88 | 8/88 (9%)                                    | 80/88 (91%)      | <0.001 |
|                           |                                              |                  |        |
| Total                     | 62/205 (30%)                                 | 143/205 (70%)    |        |

|                          | No. of patients / total No. (%) |                   | P      |
|--------------------------|---------------------------------|-------------------|--------|
|                          | > = 20%, > 80%                  | > = 80%, < = 100% |        |
| 3 copies of 1q21 n =13   | 5/13 (38%)                      | 8/13 (62%)        | 0.239  |
| >= 4 copies of 1q21 n=20 | 0/20 (0%)                       | 20/20 (100%)      | <0.001 |
|                          |                                 |                   |        |
| Total                    | 5/33 (15%)                      | 28/33 (85%)       |        |
