# Supplementary material
Source: PubMed Central journal article supplement (PMC1895503)
Supplement: blood_blood-2006-03-009910_9.pdf [file blood_blood-2006-03-009910_9.pdf]

|                  |    | Event-free survival |              |        | Overall Survival |              |        |
|------------------|----|---------------------|--------------|--------|------------------|--------------|--------|
|                  |    | %                   | HR           | 95% CI | P                | HR           | 95% CI |
| Amp1q21          | 42 | 1.92                | (1.39, 2.64) | <0.001 | 1.87             | (1.26, 2.79) | 0.002  |
| Del13            | 50 | 1.27                | (0.92, 1.74) | 0.146  | 1.33             | (0.89, 1.97) | 0.163  |
| CA               | 34 | 1.56                | (1.12, 2.16) | 0.008  | 1.89             | (1.27, 2.82) | 0.002  |
| B2M > = 3.5 mg/L | 34 | 1.37                | (0.99, 1.91) | 0.061  | 1.39             | (0.93, 2.07) | 0.113  |
| LDH > = 190 IU/L | 29 | 1.43                | (1.03, 2.01) | 0.035  | 1.54             | (1.03, 2.31) | 0.038  |
| ALB < 3.5 g/dL   | 34 | 1.28                | (0.94, 1.76) | 0.121  | 1.40             | (0.96, 2.06) | 0.082  |

- A total of 389 of the 479 newly diagnosed Myeloma patients with 1q21 FISH results had complete data for multivariate proportional hazards regression analysis. Del13 was defined by interphase FISH using D13S31 probe. If 20% of clonal plasma cells had  $\leq 1$  signal of D13S31 probe, it was considered Del13 in this analysis. We also showed multivariate analysis in Table 3 using 80% cut-point for Del13. Labeling index was not significant in either analysis. B2M; serum  $\beta$ 2-microglobulin, LDH; serum lactate dehydrogenase, ALB; serum albumin, CA; cytogenetic abnormalities
