# Supplementary material
Source: PubMed Central journal article supplement (PMC1895503)

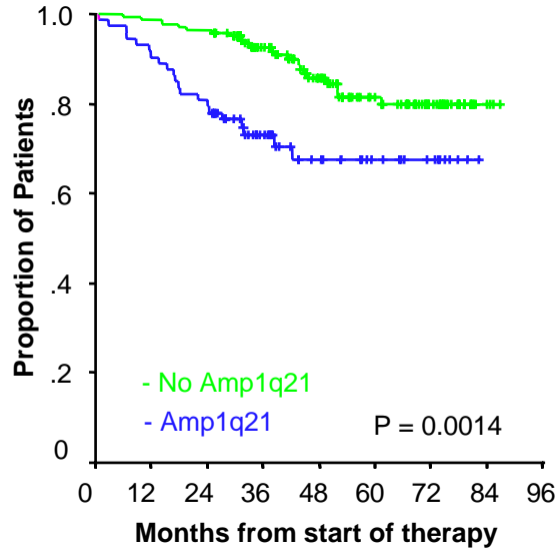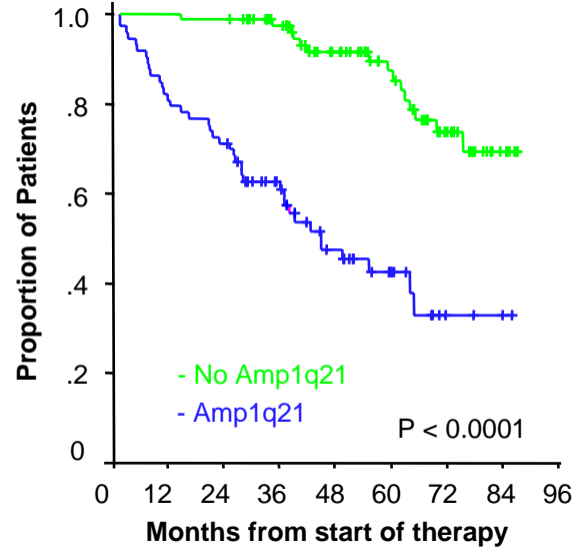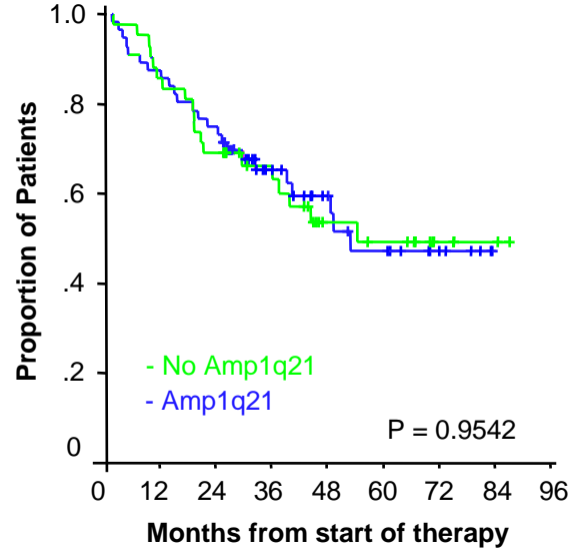

Supplement: blood_blood-2006-03-009910_6.pdf [file blood_blood-2006-03-009910_6.pdf]
